# Supplementary material
Source: ML conference proceedings conference paper supplement (https://openaccess.thecvf.com/content/CVPR2021/html/Suo_TrafficSim_Learning_To_CVPR_2021_paper.html)
Supplement: Supplementary file 1 [file Suo_TrafficSim_Learning_To_CVPR_2021_supplemental.zip]

Archive with 3 entries (3 files):
- 04856-supp.pdf
- 04856-supp_video_compressed.mp4
- __MACOSX/._04856-supp_video_compressed.mp4
